# Supplementary material for: The Potential of NIR Spectroscopy and Chemometrics to Discriminate Roast Degrees and Predict Volatiles in Coffee
Source: MDPI journal article supplement (doi:10.3390/molecules29020318), 2024-01-09
Supplement: s1 [file s1]

**Table S1**

Roasted sample bean characterization of roast temperatures, roast time, chromatic values, terminal moisture content and weight loss percentage for all samples.

| Order | Batch              | Time (min) | Temp. set (°C) | Air Temp. (°C) | Initial Temp. (°C) | Terminal Temp. (°C) | L* Pre-Ground | a* Pre-Ground | b* Pre-Ground | L* Post-Ground | a* Post-Ground | b* Post-Ground | Moisture Content (%) | Weight Loss (%) |
|-------|--------------------|------------|----------------|----------------|--------------------|---------------------|---------------|---------------|---------------|----------------|----------------|----------------|----------------------|-----------------|
| 1     | Warm up bean       | 8          | 250            | 18.5           | 119.1±4.0          | 149.6±4.3           | -             | -             | -             | -              | -              | -              | 8.08±0.18            | 11.33           |
| 2     | Ethiopian Light 1  | 9          | 232            | 19.9           | 152.0±5.1          | 174.6±2.0           | 24.06±0.82    | 7.66±0.91     | 14.50±0.89    | 24.07±0.37     | 12.55±0.15     | 23.50±0.15     | 9.46±0.27            | 10.67           |
| 3     | Ethiopian Light 2  | 9          | 232            | 18.4           | 159.6±4.0          | 172.8±1.9           | 25.23±0.55    | 7.48±0.86     | 14.74±0.53    | 24.97±1.24     | 12.21±0.35     | 23.11±0.70     | 9.24±0.37            | 18.55           |
| 4     | Ethiopian Light 3  | 9          | 232            | 15.6           | 161.5±4.2          | 179.1±4.0           | 23.62±1.68    | 7.42±0.58     | 14.53±0.99    | 24.54±1.09     | 12.28±0.20     | 22.73±0.60     | 9.22±0.25            | 11.14           |
| 5     | Ethiopian Medium 1 | 14         | 232            | 16.7           | 165.8±1.7          | 173.2±3.9           | 20.53±1.58    | 6.22±0.79     | 10.91±0.66    | 16.38±0.84     | 10.22±0.31     | 15.63±0.42     | 7.74±0.15            | 14.64           |
| 6     | Ethiopian Medium 2 | 14         | 232            | 17.1           | 153.5±3.0          | 173.2±3.1           | 21.82±1.96    | 6.92±0.50     | 11.72±0.89    | 14.25±0.87     | 9.56±0.20      | 14.55±0.42     | 7.70±0.12            | 14.28           |
| 7     | Ethiopian Medium 3 | 14         | 232            | 15.9           | 149±1.5            | 178.3±1.0           | 20.34±0.66    | 6.66±0.45     | 11.16±0.57    | 14.52±0.30     | 9.78±0.2       | 15.36±0.57     | 8.04±0.19            | 14.07           |
| 8     | Calibration bean 1 | 8          | 250            | 16.5           | 161.7±1.5          | 175.1±1.3           | 25.36±1.19    | 9.94±0.32     | 17.73±0.88    | 30.64±1.10     | 11.73±0.21     | 25.17±0.48     | 8.16±0.09            | 11.83           |
| 9     | Ethiopian Dark 1   | 14         | 250            | 16.8           | 167.8±2.0          | 201.5±4.3           | 16.00±0.67    | 5.00±0.30     | 6.71±0.46     | 7.66±0.24      | 6.55±0.11      | 7.23±0.36      | 6.68±0.16            | 17.99           |
| 10    | Ethiopian Dark 2   | 14         | 250            | 17.8           | 165.4±2.6          | 201.4±4.8           | 15.17±1.38    | 5.23±0.30     | 7.20±0.94     | 7.90±0.82      | 6.84±0.30      | 6.85±0.84      | 7.12±0.22            | 17.49           |
| 11    | Ethiopian Dark 3   | 14         | 250            | 16.2           | 161.7±2.3          | 202.2±2.9           | 15.98±0.41    | 5.33±0.55     | 6.95±0.87     | 8.62±0.72      | 7.11±0.28      | 7.45±0.47      | 6.88±0.8             | 17.07           |
| 12    | Congo Light 1      | 9          | 232            | 17.7           | 154.0±2.2          | 173.7±2.4           | 25.29±0.73    | 5.52±0.37     | 13.20±0.40    | 22.76±1.78     | 11.22±0.53     | 21.12±0.91     | 11.22±0.15           | 8.49            |
| 13    | Congo Light 2      | 9          | 232            | 19             | 164.5±1.2          | 178.7±1.9           | 22.51±0.84    | 6.05±0.56     | 12.28±0.59    | 19.16±0.55     | 10.71±0.22     | 18.97±0.29     | 10.33±0.06           | 10.68           |
| 14    | Congo Light 3      | 9          | 232            | 18.7           | 165.0±2.1          | 176.6±4.0           | 23.50±2.00    | 5.52±0.34     | 12.30±0.77    | 19.37±1.70     | 10.68±0.47     | 18.72±0.63     | 10.05±0.07           | 10.7            |
| 15    | Calibration bean 2 | 8          | 250            | 18.8           | 162.6±2.0          | 177.7±2.1           | 23.98±1.83    | 9.57±0.42     | 17.20±0.95    | 25.19±1.57     | 12.39±0.39     | 24.62±0.84     | 8.16±0.9             | 9.75            |
| 16    | Congo Medium 1     | 14         | 232            | 17.6           | 158.4±1.6          | 178.3±2.1           | 19.54±1.81    | 5.32±0.17     | 10.54±0.65    | 13.08±0.65     | 9.17±0.17      | 13.46±0.49     | 8.04±0.09            | 14.05           |
| 17    | Congo Medium 2     | 14         | 232            | 22.1           | 160.4±2.8          | 179.9±1.0           | 18.54±0.86    | 5.53±0.30     | 9.90±0.73     | 13.50±0.24     | 9.48±0.19      | 13.37±0.25     | 7.87±0.23            | 14.43           |
| 18    | Congo Medium 3     | 14         | 232            | 17.1           | 163.8±3.3          | 178.1±1.9           | 18.51±0.78    | 5.54±0.20     | 10.28±0.61    | 13.34±0.29     | 9.35±0.24      | 13.85±0.43     | 8.30±0.14            | 13.8            |
| 19    | Congo Dark 1       | 14         | 250            | 18             | 164.9±1.6          | 198.0±2.3           | 15.12±1.41    | 4.91±0.24     | 6.63±0.16     | 8.45±0.79      | 6.73±0.24      | 6.92±0.64      | 7.70±0.13            | 17.81           |
| 20    | Congo Dark 2       | 14         | 250            | 20.5           | 167.0±2.1          | 197.3±1.3           | 14.45±0.72    | 4.43±0.29     | 6.19±0.64     | 8.64±0.28      | 7.01±0.18      | 6.94±0.18      | 6.70±0.17            | 20.14           |
| 21    | Congo Dark 3       | 14         | 250            | 16.1           | 167.0±2.0          | 193.5±5.5           | 14.89±1.10    | 4.65±0.18     | 6.73±0.70     | 8.86±0.56      | 7.09±0.24      | 7.51±0.44      | 6.62±0.05            | 17.65           |
